# Supplementary material
Source: PubMed Central journal article supplement (PMC7383374)
Supplement: supp_RA120.013753_159960_2_supp_538294_qb1hs5.pdf [file supp_RA120.013753_159960_2_supp_538294_qb1hs5.pdf]

Supplementary file

**Group V secreted phospholipase A<sub>2</sub> plays a protective role against aortic dissection**

Kazuhiro Watanabe<sup>1,3,4</sup>, Yoshitaka Taketomi<sup>2,3,4</sup>, Yoshimi Miki<sup>2,3,4</sup>, Kiyotaka Kugiyama<sup>1,4\*</sup>,  
and Makoto Murakami<sup>2,3,4,5\*\*</sup>

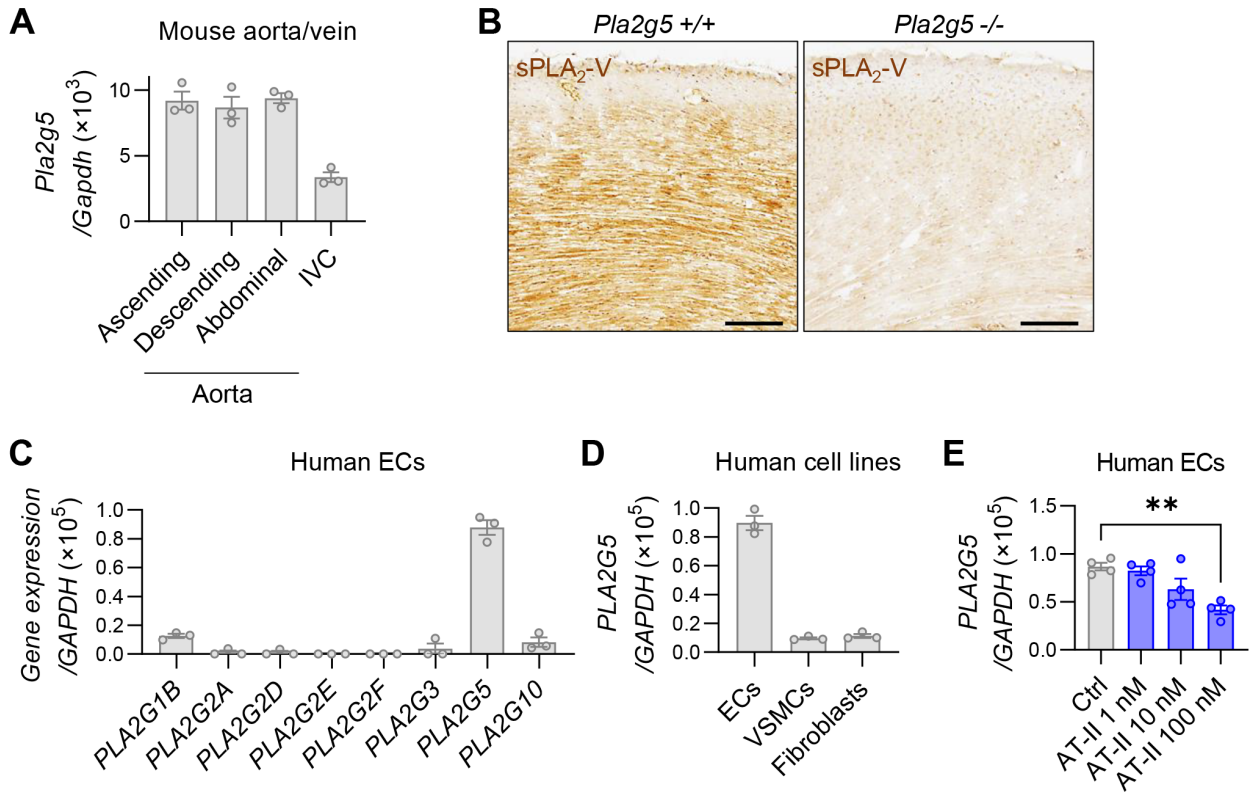

**Figure S1.**

**Expression of sPLA<sub>2</sub>-V in mouse aorta, vein and heart, and human ECs. Related to Figure 1.**

(A) Expression of *Pla2g5* in various aortas (thoracic ascending, thoracic descending, and abdominal aortas) and inferior vena cava (IVC) in mice (n=3). (B) Immunohistochemistry of sPLA<sub>2</sub>-V in the heart of *Pla2g5*<sup>+/+</sup> and *Pla2g5*<sup>-/-</sup> mice. Scale bars, 100  $\mu$ m. (C) Expression of sPLA<sub>2</sub> mRNAs relative to *GAPDH* in human umbilical vein ECs (HUVECs) (n = 3). (D) Expression of *PLA2G5* in cultured human ECs (HUVECs), VSMCs (HA-VSMCs), and fibroblasts (WI-38) (n = 3). (E) Expression of *PLA2G5* in HUVECs treated for 24 hours with or without AT-II (1-100 nM) (n = 4). \*\*P < 0.01 by one-way ANOVA followed by Tukey's multiple comparisons test. Data are presented as mean  $\pm$  SEM of the indicated number (n) of biological replicates.

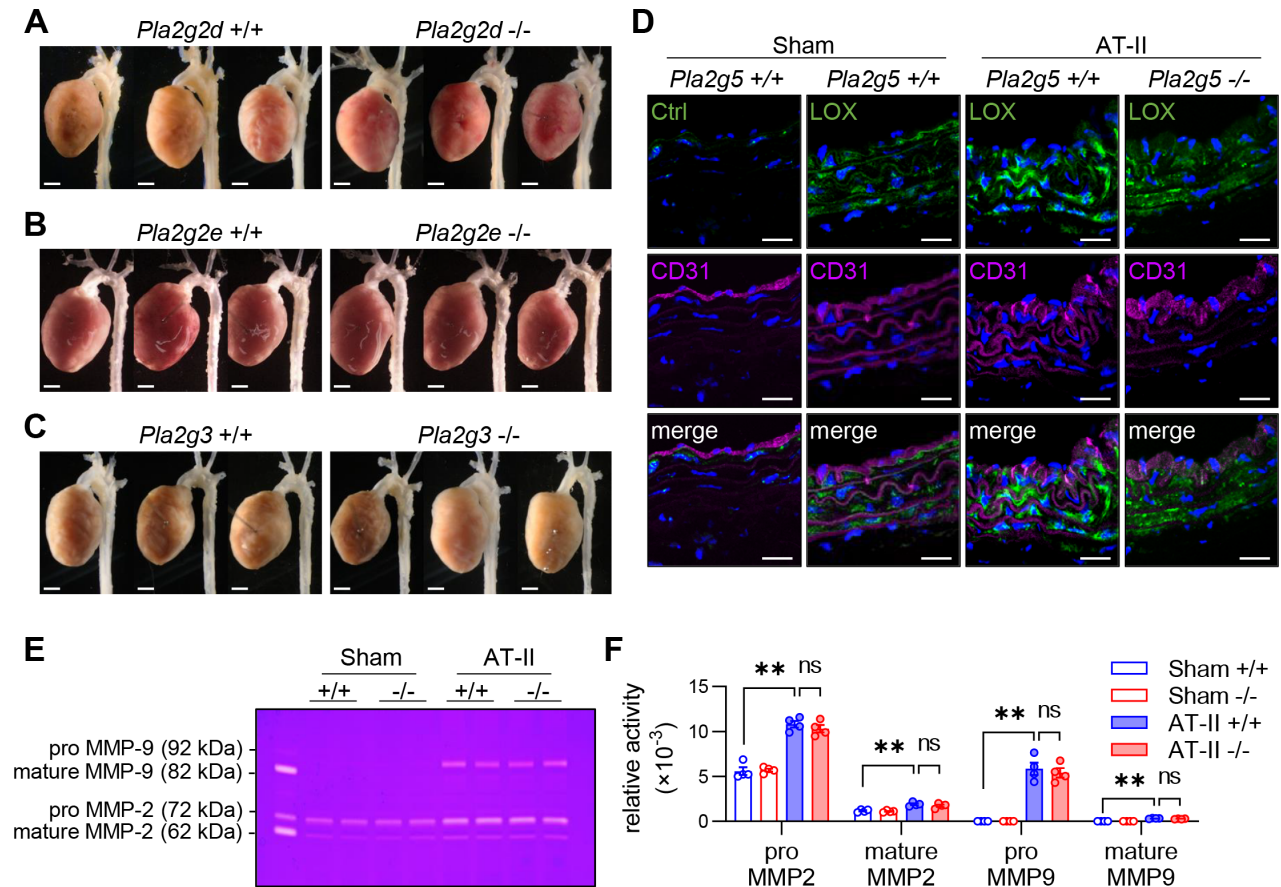

**Figure S2.**

**Thoracic aortic dissection in various sPLA<sub>2</sub> knockout mice and LOX expression and MMP activities in the aorta of *Pla2g5*<sup>+/+</sup> and *Pla2g5*<sup>-/-</sup> mice after AT-II infusion. Related to Figure 2, 3.**

(A-C) Representative photos of the thoracic aortas of *Pla2g2d*<sup>-/-</sup> (A), *Pla2g2e*<sup>-/-</sup> (B), *Pla2g3*<sup>-/-</sup> (C), and their littermate wild-type mice after 7 days of AT-II infusion. Scale bars, 1 mm. (D) Immunofluorescence of the aortas of *Pla2g5*<sup>+/+</sup> and *Pla2g5*<sup>-/-</sup> mice with or without AT-II infusion for 48 hours using control IgG (Ctrl), anti-LOX antibody (RRID: AB\_776074), which is different from that used in Figure 3g (RRID: AB\_2630340), and anti-CD31 antibody with DAPI (blue). Scale bars, 20  $\mu$ m. (E) Gelatin zymography and (F) densitometry analysis of MMP-2 and MMP-9 activities (both pro- and mature forms) in the aortas of *Pla2g5*<sup>+/+</sup> and *Pla2g5*<sup>-/-</sup> mice with or without AT-II infusion for 48 hours (n = 4). \*\*P < 0.01, and ns = not significant by two-way ANOVA followed by Tukey's multiple comparisons test. Data are represented as mean  $\pm$  SEM of the indicated number (n) of biological replicates.

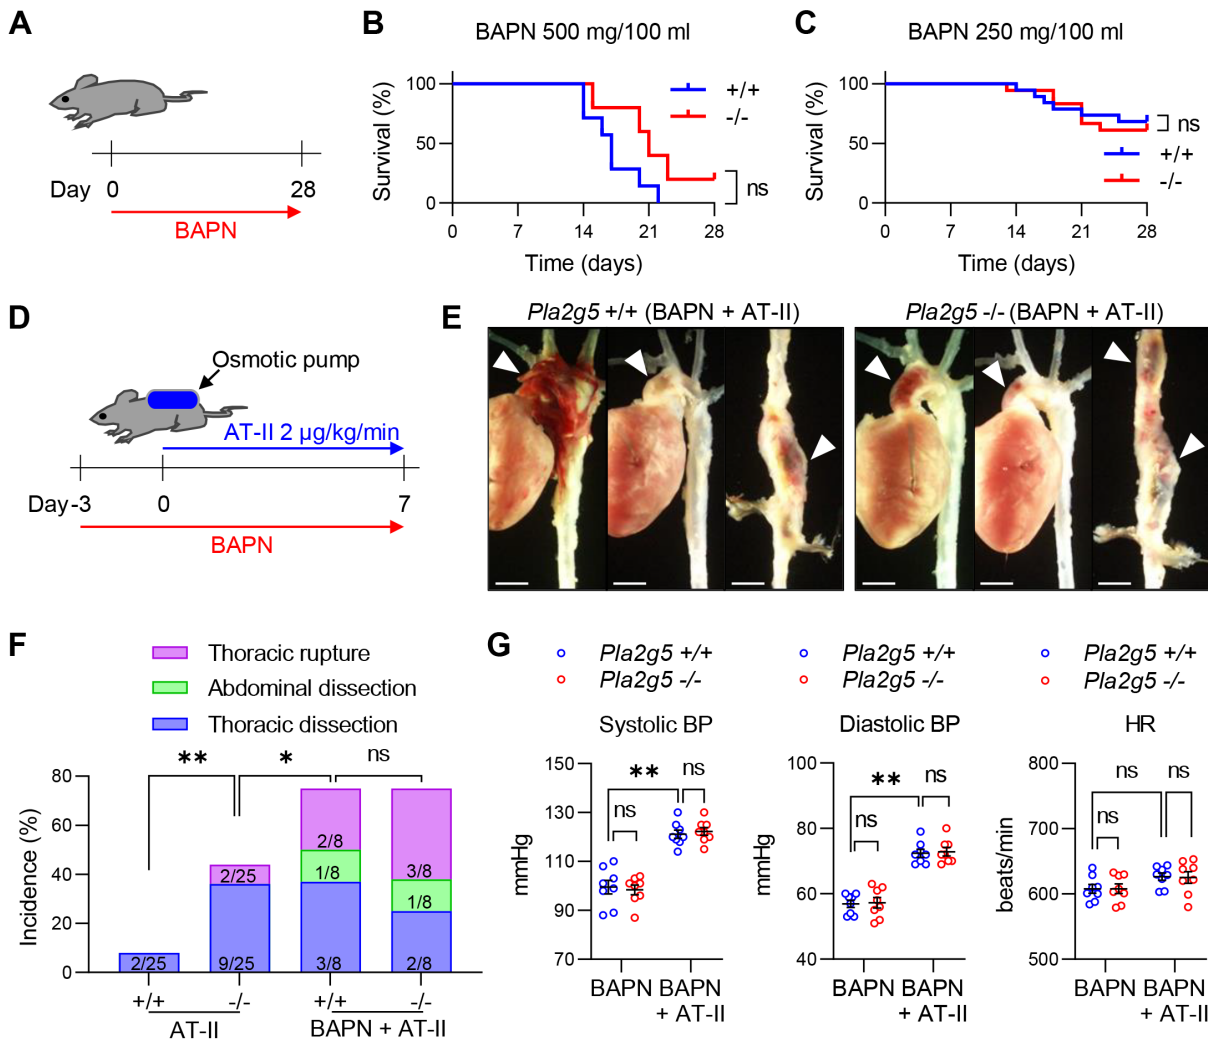

**Figure S3.**

**BAPN-induced dissection in the aorta of *Pla2g5*<sup>+/+</sup> and *Pla2g5*<sup>-/-</sup> mice after AT-II infusion. Related to Figure 3.**

(A) Schematic representation of the BAPN administration procedure. BAPN was dissolved in drinking water *ad libitum*. (B, C) Survival curves of *Pla2g5*<sup>+/+</sup> and *Pla2g5*<sup>-/-</sup> mice over 4 weeks of BAPN administration at a dose of 500 mg/100 ml (B) or 250 mg/100 ml (C). Survival curves were calculated by the Kaplan-Meier method and compared by the log-rank test. ns = not significant. (D) Schematic representation of the AT-II infusion procedure in the presence of BAPN administration. (E) Representative photos of the thoracic aortas of *Pla2g5*<sup>+/+</sup> and *Pla2g5*<sup>-/-</sup> mice after 7 days of AT-II infusion with BAPN administration (250 mg/100 ml). Arrowheads indicate aortic dissection with intramural hematoma. Scale bars, 1 mm. (F) Incidence of aortic dissection or rupture in *Pla2g5*<sup>+/+</sup> and *Pla2g5*<sup>-/-</sup> mice within 7 days of AT-II infusion with or without BAPN administration. \*P < 0.05, \*\*P < 0.01, and ns = not significant by Fisher's exact test. (G) Systolic blood pressure (BP), diastolic BP, and heart rate (HR) of BAPN treated *Pla2g5*<sup>+/+</sup> and *Pla2g5*<sup>-/-</sup> mice with or without AT-II infusion for 2 days (n = 8). \*\*P < 0.01, and ns = not significant by two-way ANOVA followed by Tukey's multiple comparisons test. Data are represented as mean ± SEM of the indicated number (n) of biological replicates.

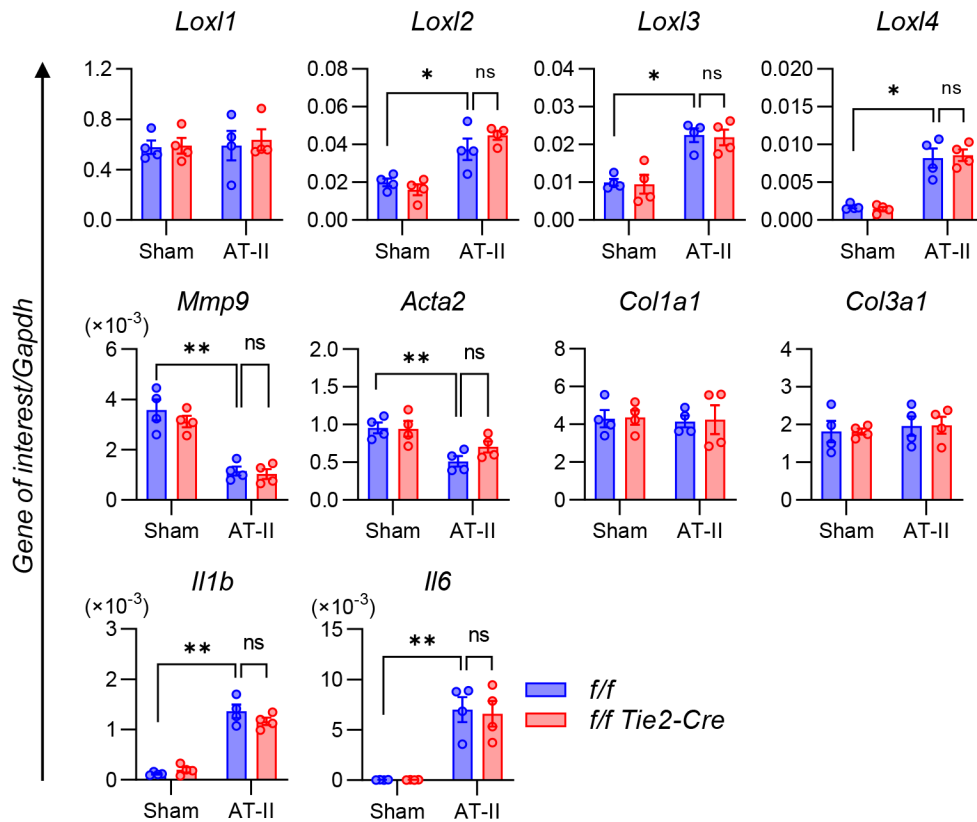

**Figure S4.**

**Quantitative RT-PCR analysis using the aorta of EC-specific *Pla2g5*-null mice. Related to Figure 4.**

mRNA expression of LOX family members, vascular remodeling markers, and pro-inflammatory cytokines in the aortas of control and EC-specific *Pla2g5*-null mice with or without AT-II infusion for 48 hours (n = 4). \*P < 0.05, \*\*P < 0.01, and ns = not significant by two-way ANOVA followed by Tukey's multiple comparisons test. Data are represented as mean  $\pm$  SEM of the indicated number (n) of biological replicates.

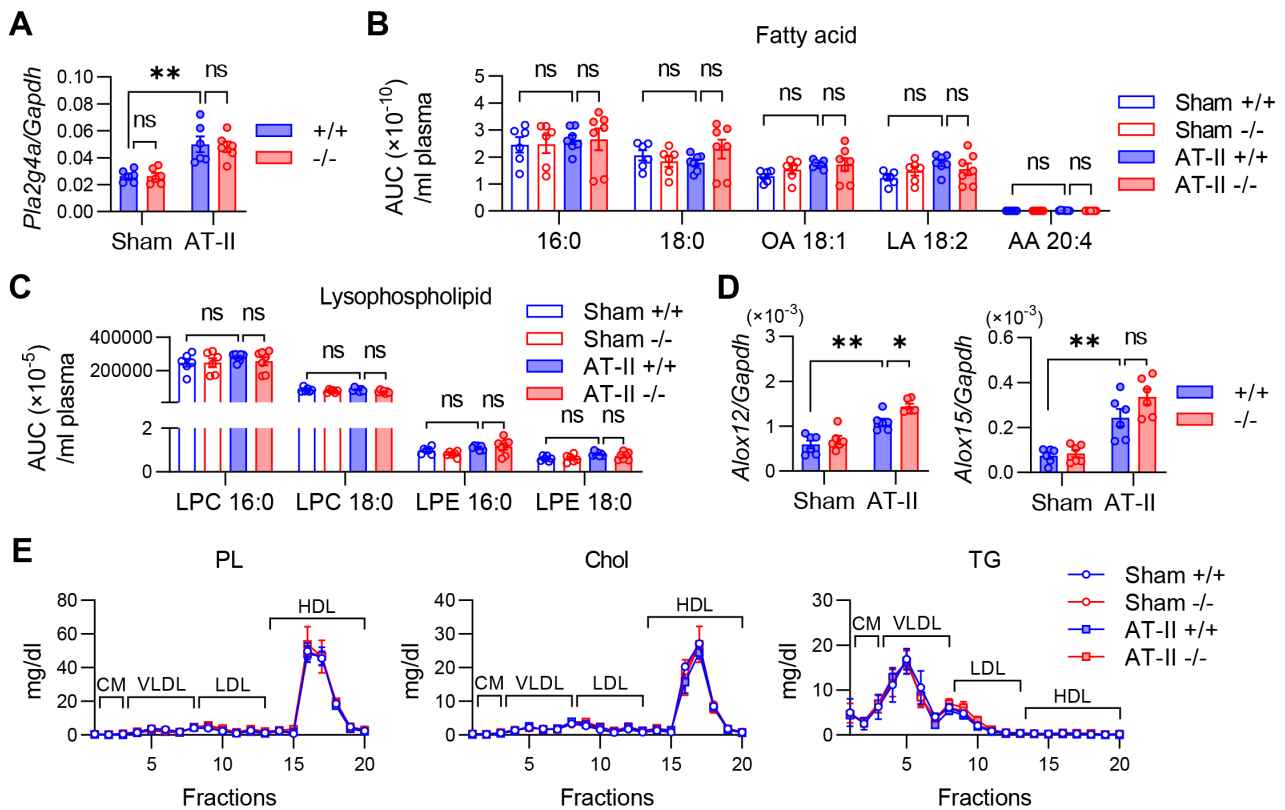

**Figure S5.**

**Aortic expression of cPLA<sub>2</sub> $\alpha$  and 12/15-lipoxygenases, plasma levels of lipids, and evaluation of plasma lipoproteins in *Pla2g5*<sup>+/+</sup> and *Pla2g5*<sup>-/-</sup> mice. Related to Figure 5.**

(A) Aortic expression of *Pla2g4a* in *Pla2g5*<sup>+/+</sup> and *Pla2g5*<sup>-/-</sup> mice (n = 6). (B, C) Plasma levels of fatty acids (B) and lysophospholipids (C) in *Pla2g5*<sup>+/+</sup> and *Pla2g5*<sup>-/-</sup> mice as assessed by LC-ESI-MS/MS (n = 6-7). (D) Aortic expression of *Alox12* and *Alox15* in *Pla2g5*<sup>+/+</sup> and *Pla2g5*<sup>-/-</sup> mice (n = 6). (E) High-performance liquid chromatography (HPLC) profiles of phospholipids (PL), cholesterol (Chol), and triglyceride (TG) in plasma lipoproteins in *Pla2g5*<sup>+/+</sup> and *Pla2g5*<sup>-/-</sup> mice (n = 3). The mice were treated for 12 hours with or without AT-II infusion. \*P < 0.05, \*\*P < 0.01, and ns = not significant by two-way ANOVA followed by Tukey's multiple comparisons test (A-D). Data are represented as mean  $\pm$  SEM of the indicated number (n) of biological replicates.

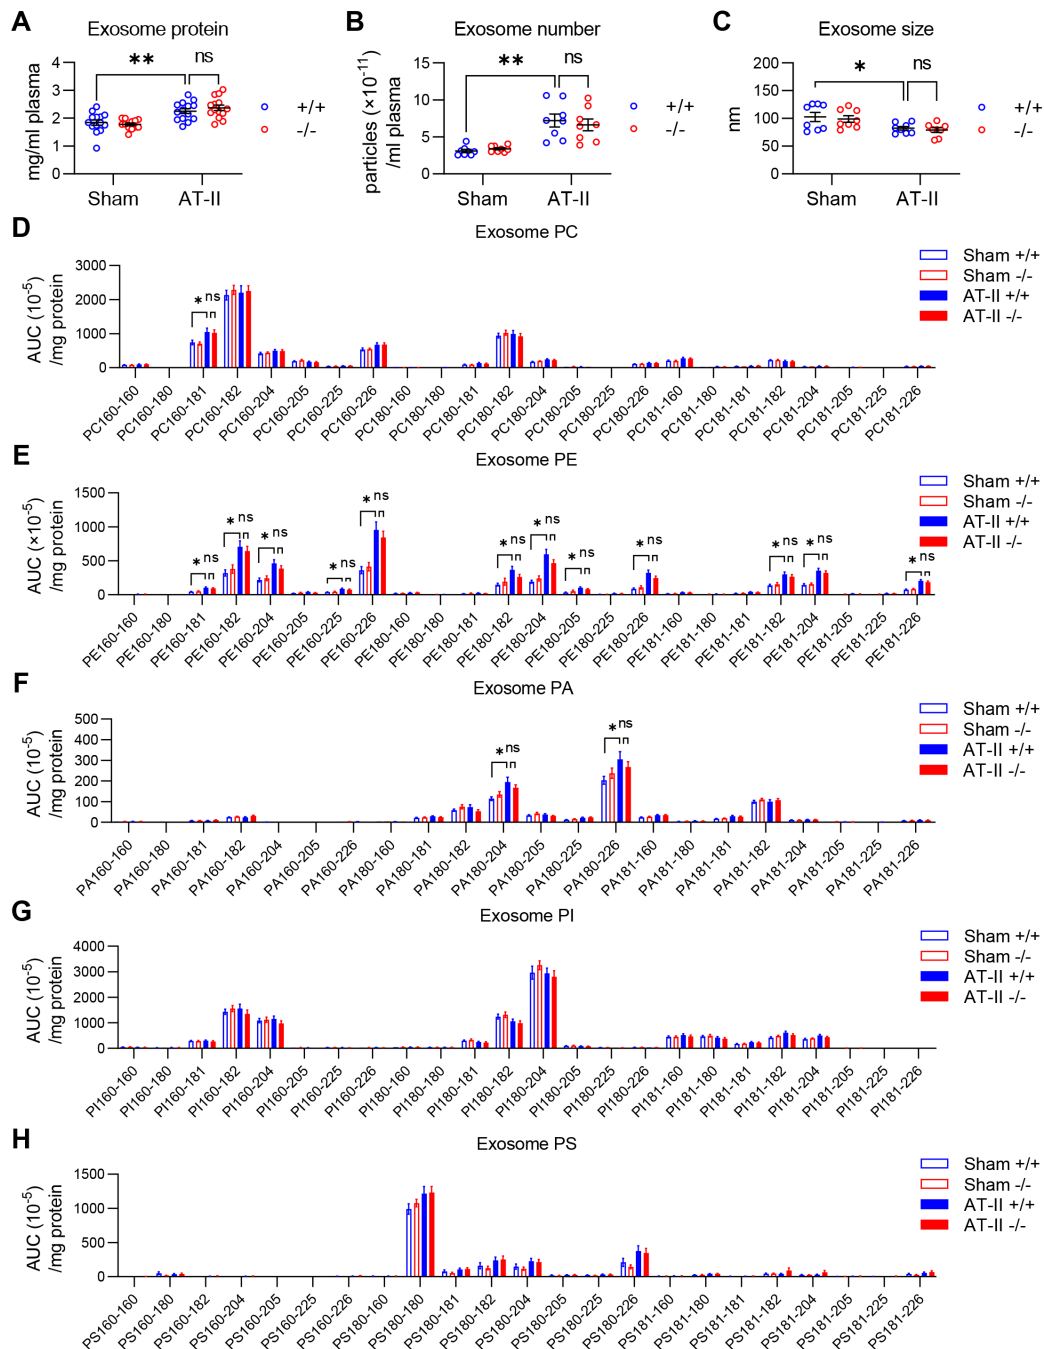

**Figure S6.**

**Analyses of plasma exosomes in *Pla2g5*<sup>+/+</sup> and *Pla2g5*<sup>-/-</sup> mice. Related to Figure 5.**

(A-C) Protein contents (n = 12-14) (A), particle numbers (n = 8) (B), and particle sizes (n = 8) (C) of plasma exosomes in *Pla2g5*<sup>+/+</sup> and *Pla2g5*<sup>-/-</sup> mice. (D-H) Phosphatidylcholine (PC) (D), phosphatidylethanolamine (PE) (E), phosphatidic acid (PA) (F), phosphatidylinositol (PI) (G) and phosphatidylserine (PS) (H) in plasma exosomes from *Pla2g5*<sup>+/+</sup> and *Pla2g5*<sup>-/-</sup> mice were assessed by LC-ESI-MS/MS (n = 12-14). The mice were treated for 12 hours with or without AT-II infusion. \*P < 0.05 and ns = not significant by two-way ANOVA followed by Tukey's multiple comparisons test. Data are represented as mean  $\pm$  SEM of the indicated number (n) of biological replicates.

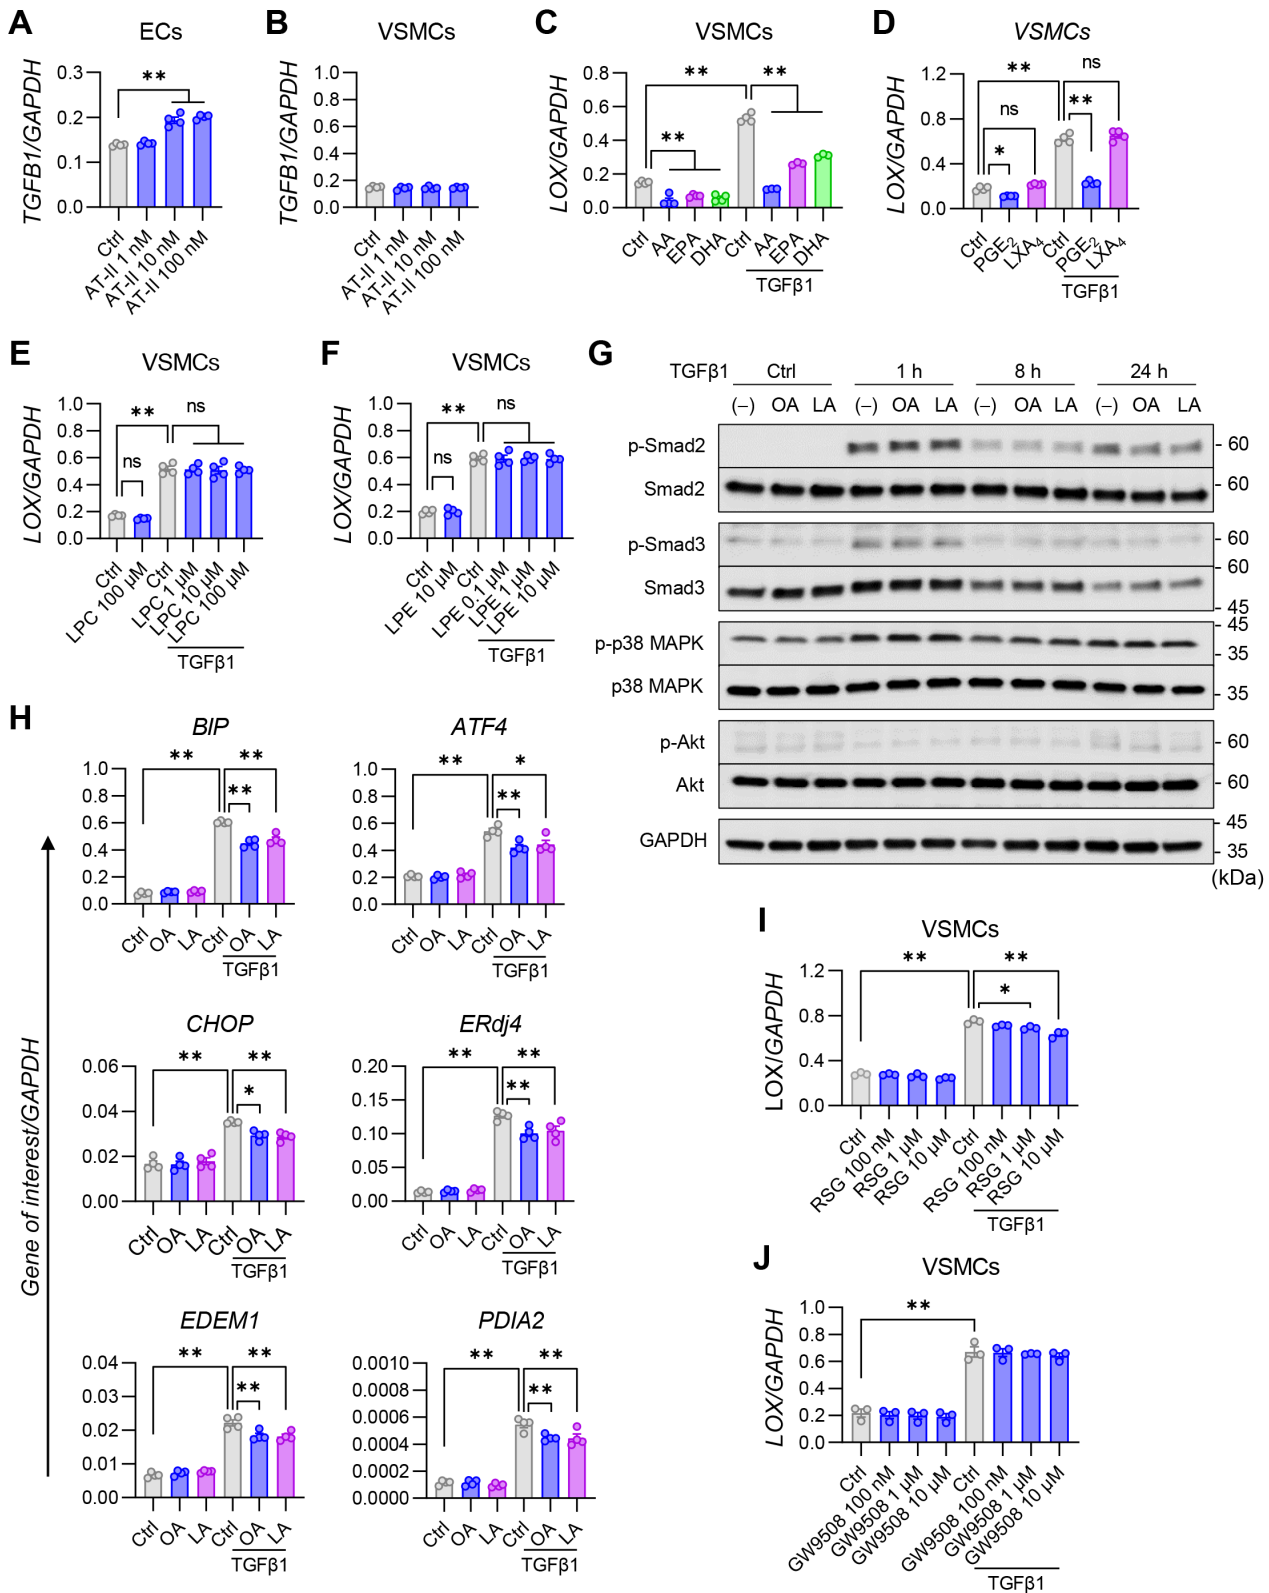

**Figure S7.**

**Effects of fatty acids, lysophospholipids, and lipid mediators on *LOX* expression and TGFβ1 signaling in ECs and VSMCs. Related to Figure 6.**



(**A, B**) Expression of *TGFB1* relative to *GAPDH* in ECs (**A**) or VSMCs (**B**) treated for 24 hours with or without AT-II (1-100 nM) (n = 4). (**C-F**) Effect of AA, EPA, or DHA (**C**), PGE<sub>2</sub> or LXA<sub>4</sub> (**D**), LPC (18:0) (**E**), and LPE (18:0) (**F**) on the expression of *LOX* in VSMCs treated for 24 hours with or without TGFβ1 (n = 4). (**G**) Immunoblot of TGFβ1 signaling proteins in VSMCs treated with TGFβ1 with or without (-) OA (100 μM) or LA (100 μM). (**H**) Expression of mRNAs for various ER stress markers, including *BIP*, *ATF4*, *CHOP*, *ERdj4*, *EDEM1*, *PDIA2*, in VSMCs treated for 24 hours with or without TGFβ1 in the presence or absence of OA (100 μM) or LA (100 μM) (n = 4). (**I, J**) Effects of RSG (PPARγ agonist) (**I**) or GW9508 (GPR40/120 agonist) (**J**) on the expression of *LOX* relative to *GAPDH* in VSMCs treated for 24 hours with or without TGFβ1 (n = 3). \*P <0.05, \*\*P <0.01, and ns = not significant by one-way ANOVA followed by Tukey's multiple comparisons test. Data are represented as mean ± SEM of the indicated number (n) of biological replicates.

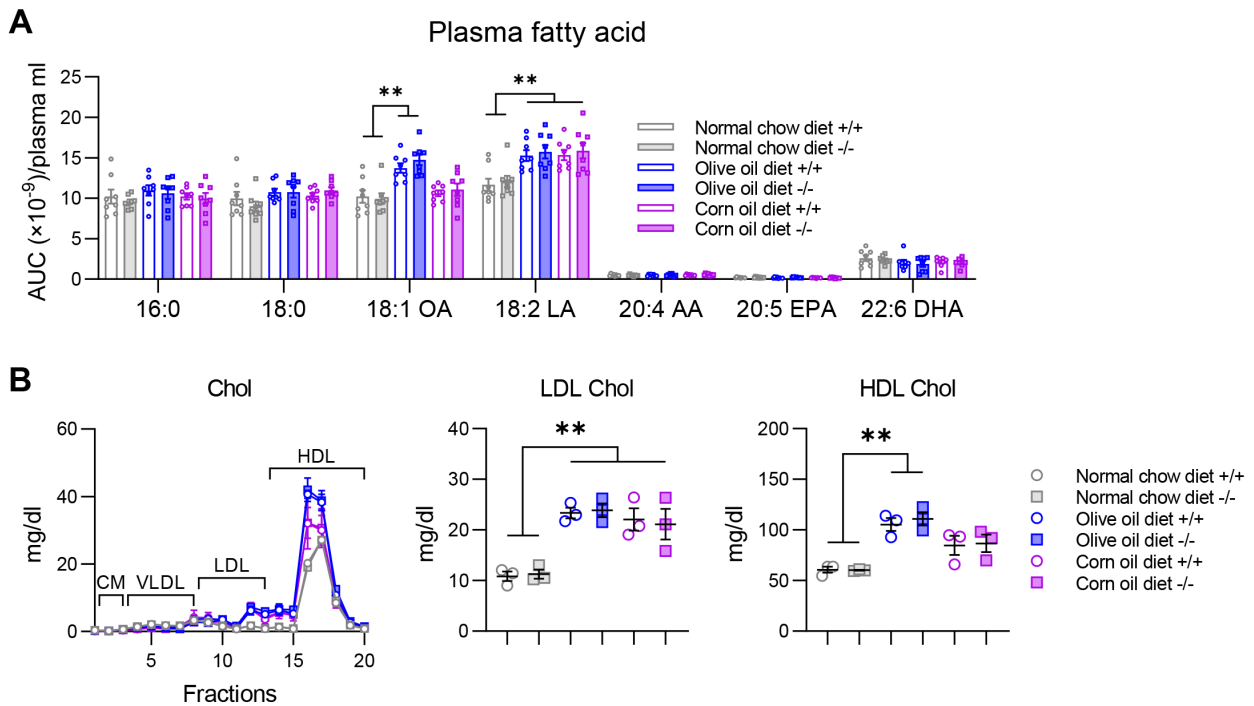

**Figure S8.**

**Plasma levels of fatty acids and lipoproteins in *Pla2g5*<sup>+/+</sup> and *Pla2g5*<sup>-/-</sup> mice fed a normal chow, olive oil-rich, or corn oil-rich diet. Related to Figure 7.**

(A) LC-ESI-MS/MS of plasma fatty acids in *Pla2g5*<sup>+/+</sup> and *Pla2g5*<sup>-/-</sup> mice (n = 8). (B) High-performance liquid chromatography (HPLC) profiles of cholesterol (Chol) in plasma lipoproteins in *Pla2g5*<sup>+/+</sup> and *Pla2g5*<sup>-/-</sup> mice (n = 3). The mice were fed a normal chow, olive oil-, or corn oil-rich diet. \*P < 0.05, \*\*P < 0.01, and ns = not significant by two-way ANOVA followed by Tukey's multiple comparisons test. Data are represented as mean ± SEM of the indicated number (n) of biological replicates.

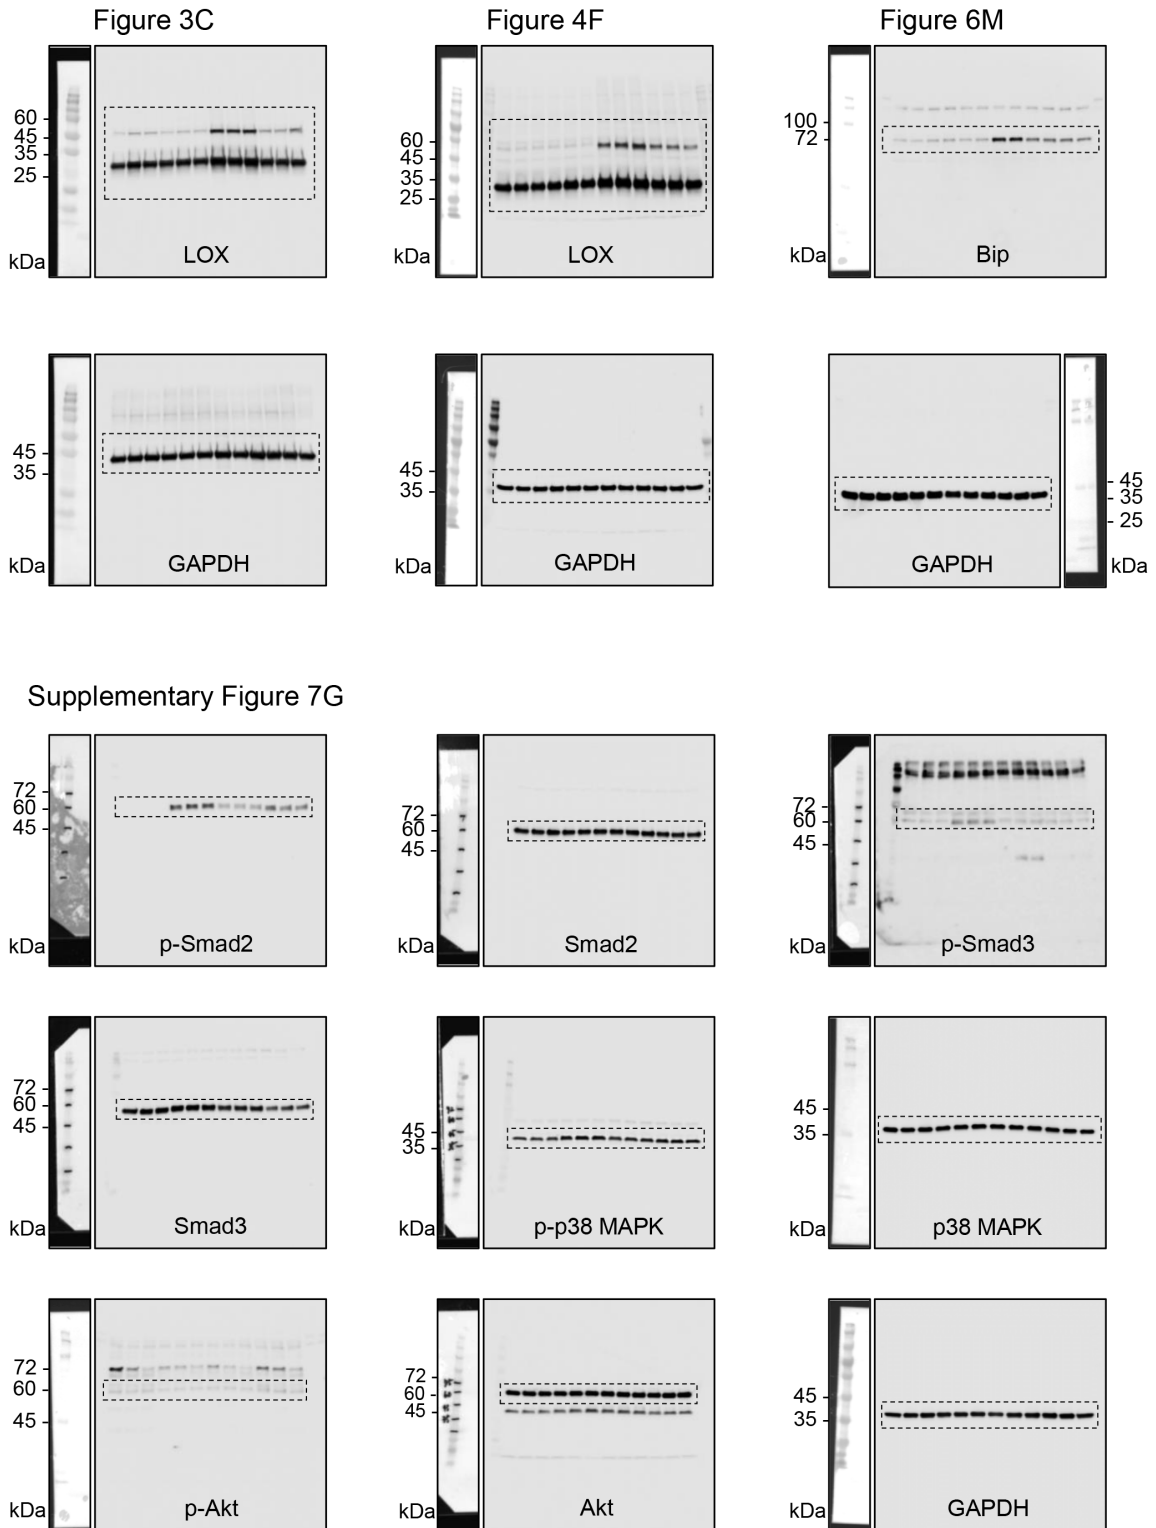

**Figure S9.**  
**Full representation of immunoblots shown in individual figures.**  
 Molecular weight markers are indicated on the left or right margins.

**Table S1.****Compositions of western diet, olive oil-rich diet, and corn oil-rich diet.**

|                    | Western diet |          | Olive oil diet |          | Corn oil diet |          |
|--------------------|--------------|----------|----------------|----------|---------------|----------|
|                    | (g %)        | (kcal %) | (g %)          | (kcal %) | (g %)         | (kcal %) |
| Protein            | 20           | 17       | 24             | 21       | 24            | 21       |
| Carbohydrate       | 50           | 43       | 45             | 39       | 45            | 39       |
| Fat                | 21           | 41       | 20             | 40       | 20            | 40       |
| Total              |              | 100      |                | 100      |               | 100      |
| kcal/g             | 4.7          |          | 4.61           |          | 4.61          |          |
| <b>Ingredient</b>  | (g)          | (kcal)   | (g)            | (kcal)   | (g)           | (kcal)   |
| Casein             | 195          | 780      | 200            | 800      | 200           | 800      |
| DL-Methionine      | 3            | 12       | 3              | 12       | 3             | 12       |
| Corn Starch        | 50           | 200      | 125            | 500      | 125           | 500      |
| Maltodextrin       | 100          | 400      |                |          |               |          |
| Sucrose            | 341          | 1364     | 249            | 996      | 249           | 996      |
| Cellulose, BW200   | 50           | 0        | 50             | 0        | 50            | 0        |
| Mineral Mix S10001 | 35           | 0        | 35             | 0        | 35            | 0        |
| Vitamin Mix V10001 | 10           | 40       | 10             | 40       | 10            | 40       |
| Choline Bitartrate | 2            | 0        | 2              | 0        | 2             | 0        |
| Milk Fat           | 200          | 1800     | 0              | 0        | 0             | 0        |
| <b>Oils</b>        |              |          |                |          |               |          |
| Soybean Oil        | 0            | 0        | 10             | 90       | 10            | 90       |
| Olive Oil          | 0            | 0        | 162.7          | 1464     | 0             | 0        |
| Corn Oil           | 10           | 90       | 0              | 0        | 162.7         | 1464     |
| Total              | 1001.54      | 4686     | 846.7          | 3902     | 846.7         | 3902     |

**Table S2.****PCR primers used in this study.**

Accession numbers for TaqMan probes (Applied Biosystems) are indicated.

| Mouse genes    | Assay no.     | Human genes    | Assay no.     |
|----------------|---------------|----------------|---------------|
| <i>Pla2g1b</i> | Mm00478249_m1 | <i>PLA2G1B</i> | Hs00386701_m1 |
| <i>Pla2g2d</i> | Mm00478250_m1 | <i>PLA2G2A</i> | Hs00179898_m1 |
| <i>Pla2g2e</i> | Mm00478870_m1 | <i>PLA2G2D</i> | Hs00173860_m1 |
| <i>Pla2g2f</i> | Mm00478872_m1 | <i>PLA2G2E</i> | Hs00173897_m1 |
| <i>Pla2g3</i>  | Mm01191142_m1 | <i>PLA2G2F</i> | Hs00224482_m1 |
| <i>Pla2g5</i>  | Mm00448162_m1 | <i>PLA2G3</i>  | Hs00210447_m1 |
| <i>Pla2g10</i> | Mm00449532_m1 | <i>PLA2G5</i>  | Hs00173472_m1 |
| <i>Tgfb1</i>   | Mm01178820_m1 | <i>PLA2G10</i> | Hs00358567_m1 |
| <i>Acta2</i>   | Mm00725412_s1 | <i>LOX</i>     | Hs00942480_m1 |
| <i>Colla1</i>  | Mm00801666_g1 | <i>GATA3</i>   | Hs00231122_m1 |
| <i>Col3a1</i>  | Mm01254476_m1 | <i>BIP</i>     | Hs00607129_gH |
| <i>Lox</i>     | Mm00495386_m1 | <i>ATF4</i>    | Hs00909569_g1 |
| <i>Loxl1</i>   | Mm01145738_m1 | <i>CHOP</i>    | Hs00358796_g1 |
| <i>Loxl2</i>   | Mm00804740_m1 | <i>ERdj4</i>   | Hs01052402_m1 |
| <i>Loxl3</i>   | Mm01184865_m1 | <i>EDEMI</i>   | Hs00976004_m1 |
| <i>Loxl4</i>   | Mm00446385_m1 | <i>PDIA2</i>   | Hs00429010_m1 |
| <i>Il1b</i>    | Mm00434228_m1 | <i>GAPDH</i>   | Hs99999905_m1 |
| <i>Il6</i>     | Mm00446190_m1 |                |               |
| <i>Tnf</i>     | Mm00443258_m1 |                |               |
| <i>Mmp2</i>    | Mm00439506_m1 |                |               |
| <i>Mmp9</i>    | Mm00442991_m1 |                |               |
| <i>Gata3</i>   | Mm00484683_m1 |                |               |
| <i>Pla2g4a</i> | Mm00447040_m1 |                |               |
| <i>Alox12</i>  | Mm00545833_m1 |                |               |
| <i>Alox15</i>  | Mm00507789_m1 |                |               |
| <i>Gapdh</i>   | Mm99999915_g1 |                |               |

**Table S3.****A list of representative multiple reaction monitoring (MRM) transitions used in LC-ESI-MS/MS.**

Quantification was performed based on the peak area of the MRM transition and calibration curve obtained with an authentic standard for each compound. DP; Declustering potential, EP; Entrance potential, CE; Collision energy, CXP; Collision cell exit potential.

| Molecular species        | Parent ion<br>( <i>m/z</i> ) | Product ion<br>( <i>m/z</i> ) | DP<br>(volts) | EP<br>(volts) | CE<br>(volts) | CXP<br>(volts) | Authentic standard<br>sources |
|--------------------------|------------------------------|-------------------------------|---------------|---------------|---------------|----------------|-------------------------------|
| <i>Fatty acids</i>       |                              |                               |               |               |               |                |                               |
| 16:0                     | 255.2                        | 255.2                         | -105          | -10           | -5            | -14            | Cayman Chemicals              |
| 18:0                     | 283.3                        | 283.3                         | -105          | -10           | -5            | -14            | Cayman Chemicals              |
| 18:1 (OA)                | 281.2                        | 281.2                         | -105          | -10           | -5            | -14            | Cayman Chemicals              |
| 18:2 (LA)                | 279.0                        | 279.0                         | -105          | -10           | -5            | -14            | Cayman Chemicals              |
| 20:0                     | 311.3                        | 311.3                         | -105          | -10           | -5            | -14            | Cayman Chemicals              |
| 20:1                     | 309.3                        | 309.3                         | -105          | -10           | -5            | -14            | Cayman Chemicals              |
| 20:2                     | 307.3                        | 307.3                         | -105          | -10           | -5            | -14            | Cayman Chemicals              |
| 20:4 (AA)                | 303.2                        | 259.1                         | -105          | -10           | -18           | -14            | Cayman Chemicals              |
| 20:5 (EPA)               | 301.2                        | 257.2                         | -80           | -10           | -16           | -14            | Cayman Chemicals              |
| 22:5                     | 329.2                        | 329.2                         | -90           | -10           | -20           | -10            | Cayman Chemicals              |
| 22:6 (DHA)               | 327.2                        | 283.2                         | -90           | -10           | -16           | -14            | Cayman Chemicals              |
| <i>Lysophospholipids</i> |                              |                               |               |               |               |                |                               |
| LPC (16:0)               | 540.4                        | 480.4                         | -80           | -10           | -24           | -15            | Avanti Polar Lipids           |
| LPC (18:0)               | 568.4                        | 508.4                         | -80           | -10           | -24           | -15            | Avanti Polar Lipids           |
| LPC (18:1)               | 566.4                        | 506.4                         | -80           | -10           | -24           | -15            | Avanti Polar Lipids           |
| LPE (16:0)               | 452.3                        | 196.0                         | -130          | -10           | -36           | -15            | Avanti Polar Lipids           |
| LPE (18:0)               | 480.3                        | 196.0                         | -130          | -10           | -36           | -15            | Avanti Polar Lipids           |
| LPE (18:1)               | 478.3                        | 196.0                         | -130          | -10           | -36           | -15            | Avanti Polar Lipids           |
| LPA (16:0)               | 409.1                        | 152.8                         | -100          | -10           | -28           | -11            | Avanti Polar Lipids           |
| LPA (18:0)               | 437.2                        | 152.8                         | -110          | -10           | -32           | -9             | Avanti Polar Lipids           |
| LPI (18:0)               | 599.2                        | 241.0                         | -95           | -10           | -48           | -11            | Avanti Polar Lipids           |
| LPS (18:0)               | 524.3                        | 152.8                         | -100          | -10           | -28           | -13            | Avanti Polar Lipids           |
| <i>Lipid mediators</i>   |                              |                               |               |               |               |                |                               |
| PGE <sub>2</sub>         | 351.2                        | 271.2                         | -75           | -10           | -24           | -14            | Cayman Chemicals              |
| PGD <sub>2</sub>         | 351.2                        | 271.2                         | -75           | -10           | -24           | -14            | Cayman Chemicals              |
| TXB <sub>2</sub>         | 369.2                        | 195.1                         | -90           | -10           | -20           | -10            | Cayman Chemicals              |
| 6-keto-PGF <sub>1α</sub> | 369.2                        | 163.1                         | -100          | -10           | -36           | -11            | Cayman Chemicals              |

|                             |       |       |     |     |     |     |                     |
|-----------------------------|-------|-------|-----|-----|-----|-----|---------------------|
| 12-HHT                      | 279.1 | 179.0 | -85 | -10 | -18 | -13 | Cayman Chemicals    |
| LTB <sub>4</sub>            | 335.2 | 194.9 | -95 | -10 | -22 | -13 | Cayman Chemicals    |
| LTD <sub>4</sub>            | 495.3 | 177.0 | -90 | -10 | -28 | -10 | Cayman Chemicals    |
| LXA <sub>4</sub>            | 351.2 | 217.2 | -75 | -10 | -28 | -14 | Cayman Chemicals    |
| 12-HETE                     | 319.2 | 179.1 | -85 | -10 | -20 | -13 | Cayman Chemicals    |
| 15-HETE                     | 319.2 | 219.1 | -90 | -10 | -15 | -10 | Cayman Chemicals    |
| 9S-HODE                     | 295.1 | 170.9 | -90 | -10 | -26 | -10 | Cayman Chemicals    |
| 13S-HODE                    | 295.1 | 170.9 | -95 | -10 | -26 | -14 | Cayman Chemicals    |
| RvE1                        | 349.2 | 195.1 | -90 | -10 | -20 | -10 | Cayman Chemicals    |
| RvD1                        | 375.2 | 215.1 | -65 | -10 | -26 | -14 | Cayman Chemicals    |
| RvD2                        | 375.2 | 174.8 | -85 | -10 | -30 | -13 | Cayman Chemicals    |
| <i>Internal standards</i>   |       |       |     |     |     |     |                     |
| <i>d5</i> -EPA              | 306.1 | 262.0 | -95 | -10 | -18 | -5  | Cayman Chemicals    |
| LPC (17:0)                  | 554.4 | 494.3 | -75 | -10 | -24 | -13 | Avanti Polar Lipids |
| <i>d4</i> -PGE <sub>2</sub> | 355.1 | 275.1 | -75 | -10 | -24 | -13 | Cayman Chemicals    |

---
